# Supplementary material
Source: publisher figshare collection journal article supplement (https://asha.figshare.com/ndownloader/files/17598221)
Supplement: Supplementary file 1 [file 17598221]

## Sheet: PubSupMat
Supplemental material, Storkel et al., “The Impact of Dose and Dose Frequency on Word Learning by Kindergarten Children With Developmental Language Disorder During Interactive Book Reading,” LSHSS, https://doi.org/10.1044/2019_LSHSS-VOIA-18-0131
Treatment Providers & Testers Coluum A shows the participant number (in bold) and then lists the treatment providers for each of the two treatments. Column B provides the overall classification of the number of primary treatment providers (in bold) and shows the percent of treatment sessions (within treatment 1 and treatment 2) for each treatment provider. Column C lists the individual who conduc…
Supplemental Material S5. Qualifications of treatment providers for each child for each treatment and qualifications of pre-/post-treatment tester.
Participant #86	Primarily 2 providers	Testers Blind to Condition	Notes		Codes
Treatment 1		Pre/Post Treatment 1			PhD Student, CCC-SLP = PhD student who was a certified speech-language pathologist
Provider 2 (PhD Student, CCC-SLP)	0.666667	Provider 12 (PhD Student)			PhD Student, MA = PhD student who completed a clinical MA but lacked CFY completion
Provider 7 (MA SLP Student)	0.266667	Provider 3 (PhD Student, MA)			PhD Student = PhD student who had not pursued a clinical MA
Provider 10 (MA SLP Student)	0.0666667				MA SLP Student = student in the MA speech-language pathology program
Treatment 2		Post Treatment 2			Out-of-Field = lab coordinator with an out-of-field degree
Provider 2 (PhD Student, CCC-SLP)	1	Provider 11 (Out-of-Field)			tx = treatment
		Provider 10 (MA SLP Student)
		Provider 4 (PhD Student, MA)
Participant #94	Primarily 1 provider	Testers Blind to Condition
Treatment 1		Pre/Post Treatment 1
Provider 4 (PhD Student, MA)	0.8	Provider 12 (PhD Student)
Provider 2 (PhD Student, CCC-SLP)	0.2	Provider 7 (MA SLP Student)
Treatment 2		Post Treatment 2
Provider 4 (PhD Student, MA)	0.913043	Provider 12 (PhD Student)
Provider 3 (PhD Student, MA)	0.0434783
Provider 7 (MA SLP Student)	0.0434783
Participant #96	Primarily 1 provider	Testers Blind to Condition
Treatment 1		Pre/Post Treatment 1
Provider 3 (PhD Student, MA)	1	Provider 12 (PhD Student)
		Provider 11 (Out-of-Field)
Treatment 2		Post Treatment 2
Provider 3 (PhD Student, MA)	1	Provider 7 (MA SLP Student)
		Provider 15 (MA SLP Student)
Participant #101	Primarily 2 providers	Testers Blind to Condition
Treatment 1		Pre/Post Treatment 1
Provider 7 (MA SLP Student)	0.565217	Provider 12 (PhD Student)
Provider 2 (PhD Student, CCC-SLP)	0.26087	Provider 16 (MA SLP Student)
Provider 10 (MA SLP Student)	0.130435
Provider 3 (PhD Student, MA)	0.0434783
Treatment 2		Post Treatment 2
Provider 2 (PhD Student, CCC-SLP)	0.533333	Provider 12 (PhD Student)
Provider 7 (MA SLP Student)	0.466667
Participant #102	Primarily 2 providers	Testers Blind to Condition
Treatment 1		Pre/Post Treatment 1
Provider 7 (MA SLP Student)	0.533333	Provider 12 (PhD Student)
Provider 3 (PhD Student, MA)	0.466667	Provider 4 (PhD Student, MA)
Treatment 2		Post Treatment 2
Provider 7 (MA SLP Student)	0.8	Provider 12 (PhD Student)
Provider 3 (PhD Student, MA)	0.2
Participant #103	Primarily 2 providers	Testers Blind to Condition
Treatment 1		Pre/Post Treatment 1
Provider 3 (PhD Student, MA)	0.466667	Provider 12 (PhD Student)
Provider 2 (PhD Student, CCC-SLP)	0.466667
Provider 11 (Out-of-Field)	0.0666667
Treatment 2		Post Treatment 2
Provider 2 (PhD Student, CCC-SLP)	0.6	Provider 12 (PhD Student)
Provider 3 (PhD Student, MA)	0.4
Participant #108	Primarily 2 providers	Testers Blind to Condition
Treatment 1		Pre/Post Treatment 1
Provider 2 (PhD Student, CCC-SLP)	0.521739	Provider 12 (PhD Student)
Provider 4 (PhD Student, MA)	0.478261	Provider 3 (PhD Student, MA)
Treatment 2		Post Treatment 2
Provider 4 (PhD Student, MA)	0.6	Provider 12 (PhD Student)
Provider 2 (PhD Student, CCC-SLP)	0.4
Participant #111	Primarily 2 providers	Testers Blind to Condition
Treatment 1		Pre/Post Treatment 1
Provider 7 (MA SLP Student)	0.6	Provider 12 (PhD Student)
Provider 3 (PhD Student, MA)	0.4	Provider 7 (MA SLP Student)	Administered pre-treatment while still blind to condition
Treatment 2		Post Treatment 2
Provider 7 (MA SLP Student)	0.608696	Provider 12 (PhD Student)
Provider 3 (PhD Student, MA)	0.391304	Provider 2 (PhD Student, CCC-SLP)
		Provider 4 (PhD Student, MA)
Participant #113	Primarily 1 provider	Testers Blind to Condition
Treatment 1		Pre/Post Treatment 1
Provider 4 (PhD Student, MA)	1	Provider 4 (PhD Student, MA)	Administered pre-treatment while still blind to condition
		Provider 2 (PhD Student, CCC-SLP)
		Provider 7 (MA SLP Student)
Treatment 2		Post Treatment 2
Provider 4 (PhD Student, MA)	1	Provider 3 (PhD Student, MA)
		Provider 15 (MA SLP Student)
		Provider 13 (MA SLP Student)
Participant #114	Primarily 2 providers	Difficulty with blinding
Treatment 1		Pre/Post Treatment 1
Provider 4 (PhD Student, MA)	0.7	Provider 12 (PhD Student)
Provider 7 (MA SLP Student)	0.3	Provider 2 (PhD Student, CCC-SLP)
		Provider 7 (MA SLP Student)	Provider 7 conducted the first 3 treatment sessions and then Provider 4 conducted the last 7 treatment sessions. Due to scheduling constraints, Provider 7 administered 1 of 2 immediate post-treatment tests and 1 of 2 2-week post-treatment tests
Treatment 2		Post Treatment 2
Provider 4 (PhD Student, MA)	1	Provider 13 (MA SLP Student)
		Provider 15 (MA SLP Student)
		Provider 12 (PhD Student)
Participant #115	Primarily 2 providers	Testers Blind to Condition
Treatment 1		Pre/Post Treatment 1
Provider 2 (PhD Student, CCC-SLP)	0.533333	Provider 12 (PhD Student)
Provider 3 (PhD Student, MA)	0.466667
Treatment 2		Post Treatment 2
Provider 2 (PhD Student, CCC-SLP)	0.6	Provider 12 (PhD Student)
Provider 3 (PhD Student, MA)	0.4	Provider 4 (PhD Student, MA)
		Provider 7 (MA SLP Student)
Participant #117	Primarily 2 providers	Testers Blind to Condition
Treatment 1		Pre/Post Treatment 1
Provider 3 (PhD Student, MA)	0.466667	Provider 12 (PhD Student)
Provider 4 (PhD Student, MA)	0.4	Provider 7 (MA SLP Student)
Provider 11 (Out-of-Field)	0.133333
Treatment 2		Post Treatment 2
Provider 4 (PhD Student, MA)	0.913043	Provider 8 (MA SLP Student)
Provider 3 (PhD Student, MA)	0.0434783	Provider 14 (MA SLP Student)
Provider 7 (MA SLP Student)	0.0434783
Participant #121	Primarily 1 provider	Testers Blind to Condition
Treatment 1		Pre/Post Treatment 1
Provider 1 (PhD Student, CCC-SLP)	1	Provider 12 (PhD Student)
Treatment 2		Post Treatment 2
Provider 1 (PhD Student, CCC-SLP)	1	Provider 12 (PhD Student)
Participant #122	Primarily 1 provider	Testers Blind to Condition
Treatment 1		Pre/Post Treatment 1
Provider 8 (MA SLP Student)	0.73913	Provider 12 (PhD Student)
Provider 1 (PhD Student, CCC-SLP)	0.173913
Provider 7 (MA SLP Student)	0.0869565
Treatment 2		Post Treatment 2
Provider 8 (MA SLP Student)	1	Provider 12 (PhD Student)
Participant #123	Primarily 1 provider for tx 1 and another for tx 2	Testers Blind to Condition
Treatment 1		Pre/Post Treatment 1
Provider 1 (PhD Student, CCC-SLP)	1	Provider 12 (PhD Student)
Treatment 2		Post Treatment 2
Provider 3 (PhD Student, MA)	1	Provider 12 (PhD Student)
		Provider 8 (MA SLP Student)
Participant #125	Primarily 2 providers	Difficulty with blinding
Treatment 1		Pre/Post Treatment 1
Provider 1 (PhD Student, CCC-SLP)	0.956522	Provider 12 (PhD Student)
Provider 7 (MA SLP Student)	0.0434783	Provider 7 (MA SLP Student)	Provider 7 conducted 1 of 23 treatment sessions (specifically session 11). Due to scheduling constraints, Provider 7 administered 2 of 2 2-week post-treatment tests
Treatment 2		Post Treatment 2
Provider 3 (PhD Student, MA)	0.533333	Provider 12 (PhD Student)
Provider 7 (MA SLP Student)	0.466667	Provider 8 (MA SLP Student)
Participant #129	Primarily 1 provider	Testers Blind to Condition
Treatment 1		Pre/Post Treatment 1
Provider 8 (MA SLP Student)	1	Provider 8 (MA SLP Student)	Administered pre-treatment while still blind to condition
		Provider 12 (PhD Student)
Treatment 2		Post Treatment 2
Provider 8 (MA SLP Student)	0.933333	Provider 12 (PhD Student)
Provider 7 (MA SLP Student)	0.0666667
Participant #130	Primarily 1 provider	Testers Blind to Condition
Treatment 1		Pre/Post Treatment 1
Provider 8 (MA SLP Student)	1	Provider 8 (MA SLP Student)	Administered pre-treatment while still blind to condition
		Provider 12 (PhD Student)
Treatment 2		Post Treatment 2
Provider 8 (MA SLP Student)	1	Provider 12 (PhD Student)
Participant #132	Primarily 1 provider	Testers Blind to Condition
Treatment 1		Pre/Post Treatment 1
Provider 7 (MA SLP Student)	1	Provider 7 (MA SLP Student)	Administered pre-treatment while still blind to condition
		Provider 12 (PhD Student)
		Provider 1 (PhD Student, CCC-SLP)
		Provider 8 (MA SLP Student)
Treatment 2		Post Treatment 2
Provider 7 (MA SLP Student)	0.866667	Provider 12 (PhD Student)
Provider 3 (PhD Student, MA)	0.0666667
Provider 5 (MA SLP Student)	0.0666667
Participant #133	Primarily 3 providers	Testers Blind to Condition
Treatment 1		Pre/Post Treatment 1
Provider 1 (PhD Student, CCC-SLP)	0.733333	Provider 12 (PhD Student)
Provider 7 (MA SLP Student)	0.2
Provider 3 (PhD Student, MA)	0.0666667
Treatment 2		Post Treatment 2
Provider 7 (MA SLP Student)	0.652174	Provider 8 (MA SLP Student)
Provider 3 (PhD Student, MA)	0.347826	Provider 5 ( MA SLP Student)
Participant #134	Primarily 1 provider	Testers Blind to Condition
Treatment 1		Pre/Post Treatment 1
Provider 8 (MA SLP Student)	1	Provider 12 (PhD Student)
Treatment 2		Post Treatment 2
Provider 8 (MA SLP Student)	0.9	Provider 7 (MA SLP Student)
Provider 1 (PhD Student, CCC-SLP)	0.1
Participant #135	Primarily 1 provider	Testers Blind to Condition
Treatment 1		Pre/Post Treatment 1
Provider 7 (MA SLP Student)	1	Provider 12 (PhD Student)
Treatment 2		Post Treatment 2
Provider 7 (MA SLP Student)	1	Provider 12 (PhD Student)
		Provider 1 (PhD Student, CCC-SLP)
Participant #136	Primarily 1 provider	Testers Blind to Condition
Treatment 1		Pre/Post Treatment 1
Provider 1 (PhD Student, CCC-SLP)	1	Provider 12 (PhD Student)
Treatment 2		Post Treatment 2
Provider 1 (PhD Student, CCC-SLP)	0.9	Provider 12 (PhD Student)
Provider 3 (PhD Student, MA)	0.1	Provider 7 (MA SLP Student)
Participant #139	Primarily 1 provider	Testers Blind to Condition
Treatment 1		Pre/Post Treatment 1
Provider 1 (PhD Student, CCC-SLP)	1	Provider 12 (PhD Student)
		Provider 8 (MA SLP Student)
Treatment 2		Post Treatment 2
Provider 1 (PhD Student, CCC-SLP)	0.866667	Provider 5 ( MA SLP Student)
Provider 7 (MA SLP Student)	0.133333	Provider 8 (MA SLP Student)
Participant #141	Primarily 1 provider for tx 1 and another for tx 2	Testers Blind to Condition
Treatment 1		Pre/Post Treatment 1
Provider 8 (MA SLP Student)	0.866667	Provider 5 ( MA SLP Student)
Provider 9 (MA SLP Student)	0.133333	Provider 12 (PhD Student)
Treatment 2		Post Treatment 2
Provider 5 (MA SLP Student)	0.956522	Provider 12 (PhD Student)
Provider 9 (MA SLP Student)	0.0434783	Provider 1 (PhD Student, CCC-SLP)
Participant #142	Primarily 1 provider	Testers Blind to Condition
Treatment 1		Pre/Post Treatment 1
Provider 1 (PhD Student, CCC-SLP)	1	Provider 12 (PhD Student)
		Provider 5 ( MA SLP Student)
Treatment 2		Post Treatment 2
Provider 1 (PhD Student, CCC-SLP)	1	Provider 12 (PhD Student)
		Provider 5 ( MA SLP Student)
Participant #145	Primarily 1 provider	Testers Blind to Condition
Treatment 1		Pre/Post Treatment 1
Provider 1 (PhD Student, CCC-SLP)	0.956522	Provider 12 (PhD Student)
Provider 5 (MA SLP Student)	0.0434783	Provider 8 (MA SLP Student)
Treatment 2		Post Treatment 2
Provider 1 (PhD Student, CCC-SLP)	1	Provider 12 (PhD Student)
		Provider 5 ( MA SLP Student)
Participant #146	Primarily 3 providers	Testers Blind to Condition
Treatment 1		Pre/Post Treatment 1
Provider 9 (MA SLP Student)	0.6	Provider 8 (MA SLP Student)
Provider 1 (PhD Student, CCC-SLP)	0.3	Provider 5 ( MA SLP Student)	Administered pre-treatment while still blind to condition
Provider 5 (MA SLP Student)	0.1
Treatment 2		Post Treatment 2
Provider 1 (PhD Student, CCC-SLP)	0.266667	Provider 12 (PhD Student)
Provider 6 (MA SLP Student)	0.266667
Provider 9 (MA SLP Student)	0.2
Provider 5 (MA SLP Student)	0.133333
Provider 8 (MA SLP Student)	0.133333
Participant #151	Primarily 3 providers	Testers Blind to Condition
Treatment 1		Pre/Post Treatment 1
Provider 5 (MA SLP Student)	0.521739	Provider 12 (PhD Student)
Provider 9 (MA SLP Student)	0.478261
Treatment 2		Post Treatment 2
Provider 7 (MA SLP Student)	0.933333	Provider 6 ( MA SLP Student)
Provider 1 (PhD Student, CCC-SLP)	0.0666667
Participant #152	Primarily 1 provider	Difficulty with blinding
Treatment 1		Pre/Post Treatment 1
Provider 8 (MA SLP Student)	0.9	Provider 12 (PhD Student)
Provider 5 (MA SLP Student)	0.1	Provider 5 ( MA SLP Student)	Provider 5 conducted 1 of 10 treatment sessions (specifically session 2). Due to scheduling constraints, Provider 5 administered 2 of 2 immediate post-treatment tests and 2 of 2 2-week post-treatment tests
Treatment 2		Post Treatment 2
Provider 8 (MA SLP Student)	0.8	Provider 1 (PhD Student, CCC-SLP)
Provider 9 (MA SLP Student)	0.2
Participant #153	Primarily 3 providers	Testers Blind to Condition
Treatment 1		Pre/Post Treatment 1
Provider 8 (MA SLP Student)	0.782609	Provider 5 ( MA SLP Student)	Administered pre-treatment while still blind to condition
Provider 9 (MA SLP Student)	0.130435	Provider 12 (PhD Student)
Provider 5 (MA SLP Student)	0.0869565
Treatment 2		Post Treatment 2
Provider 5 (MA SLP Student)	0.6	Provider 12 (PhD Student)
Provider 1 (PhD Student, CCC-SLP)	0.4	Provider 7 (MA SLP Student)
Participant #155	Primarily 4 providers	Difficulty with blinding
Treatment 1		Pre/Post Treatment 1
Provider 9 (MA SLP Student)	0.5	Provider 5 ( MA SLP Student)	Administered pre-treatment while still blind to condition
Provider 5 (MA SLP Student)	0.4	Provider 12 (PhD Student)
Provider 8 (MA SLP Student)	0.1	Provider 8 (MA SLP Student)	Provider 8 conducted 1 of 10 treatment sessions (specifically session 9). Due to scheduling constraints, Provider 8 administered 1 of 2 immediate post-treatment tests.
Treatment 2		Post Treatment 2
Provider 6 (MA SLP Student)	0.533333	Provider 5 ( MA SLP Student)	Provider 5 conducted the first four treatment sessions (out of 10) for Treatment 1. Due to scheduling constraints, Provider 5 administered 2 of 2 immediate post-treatment tests and 2 of 2 2-week post-treatment tests
Provider 1 (PhD Student, CCC-SLP)	0.266667
Provider 9 (MA SLP Student)	0.2
Participant #156	Primarily 3 providers	Testers Blind to Condition
Treatment 1		Pre/Post Treatment 1
Provider 8 (MA SLP Student)	0.6	Provider 12 (PhD Student)
Provider 1 (PhD Student, CCC-SLP)	0.333333	Provider 8 (MA SLP Student)	Administered pre-treatment while still blind to condition
Provider 9 (MA SLP Student)	0.0666667
Treatment 2		Post Treatment 2
Provider 1 (PhD Student, CCC-SLP)	0.478261	Provider 12 (PhD Student)
Provider 6 (MA SLP Student)	0.304348	Provider 7 (MA SLP Student)
Provider 5 (MA SLP Student)	0.217391
Participant #158	Primarily 1 provider for tx 1 and another for tx 2	Testers Blind to Condition
Treatment 1		Pre/Post Treatment 1
Provider 9 (MA SLP Student)	1	Provider 8 (MA SLP Student)
		Provider 12 (PhD Student)
		Provider 1 (PhD Student, CCC-SLP)
Treatment 2		Post Treatment 2
Provider 5 (MA SLP Student)	1	Provider 12 (PhD Student)
